# Supplementary material for: Restrictive fluids versus standard care in adults with sepsis in the emergency department (REFACED): A multicenter, randomized feasibility trial
Source: PubMed Central journal article supplement — Acad Emerg Med. 2022 Aug 5;29(10):1172–84. doi: 10.1111/acem.14546 (PMC9804491; doi:10.1111/acem.14546), 2022-08-05
Supplement: ACEM-29-1172-s001.pdf [file ACEM-29-1172-s001.pdf]

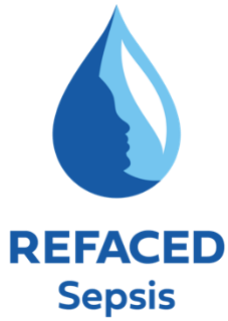

## SUPPLEMENTARY INDEX

### **Restrictive Fluid Administration versus Standard of Care in Emergency Department Sepsis Patients (REFACED Sepsis) – a Multicenter, Randomized Clinical Feasibility Trial**

Supplement\_S1.pdf

Expanded material, tables of all screened patients, details on fluid administration, figures of fluids etc. (PDF, 28 pages, 845 kB)

Content:

Supplemental Material 1:

- Supplemental methods
- Tables S1-9
- Figures S1-7

Supplement\_S2.pdf

Trial protocol for the REFACED Sepsis trial (PDF, 63 pages, 1.4 MB)
